# Supplementary material for: Mercury ion-engineering Au plasmonics on MoS2 layers for absorption-shifted optical sensors
Source: Royal Society of Chemistry journal article supplement (doi:10.1039/d1ay01637g), 2021-01-01
Supplement: d1ay01637g1.pdf [file d1ay01637g1.pdf]

Electronic Supplementary Information (ESI) for the Analytical Methods.

This journal is © The Royal Society of Chemistry 2021

## Supplementary Information

### **Mercury ion-engineering Au plasmonics on MoS<sub>2</sub> layers for absorption-shifted optical sensors**

Jun Jiang Luo,<sup>a, b</sup> Ling Yun Qin,<sup>a</sup> Xiao Juan Du,<sup>a</sup> Hong Qun Luo,<sup>a</sup> Nian Bing Li,<sup>a</sup> and Bang Lin Li<sup>\*a, b</sup>

<sup>a</sup> Laboratory of Luminescence Analysis and Molecular Sensing (Southwest University), Ministry of Education, School of Chemistry and Chemical Engineering, Southwest University, Chongqing 400715, P. R. China.

<sup>b</sup> Hanhong College, Southwest University, Chongqing 400715, P. R. China.

\*Correspondence and requests for materials should be addressed to B. L. Li ([chemlibl@swu.edu.cn](mailto:chemlibl@swu.edu.cn))

## **1. Experimental Sections**

### ***1.1. Materials***

Molybdenum disulfide ( $\text{MoS}_2$  crystalline powder,  $< 2 \mu\text{m}$ , 99%), tetrachloroauric acid ( $\text{HAuCl}_4$ ) and mercury nitrate were obtained from Sigma-Aldrich Co. (USA). Sodium cholate (98%), Cetyltrimethyl Ammonium Bromide (CTAB), cadmium nitrate tetrahydrate and cobalt chloride hexahydrate were obtained from Aladdin Chemistry Co. Ltd. (Shanghai, China). Mercury nitrate was purchased from Sigma Aldrich (USA). Ethylene Diamine Tetraacetic Acid (EDTA), L-ascorbic acid (L-AA), manganese chloride and nickel chloride hexahydrate were obtained from Adamas-Beta Chemistry Co. Ltd. (Shanghai, China). Zinc nitrate dihydrate, Lead nitrate and calcium nitrate were obtained from KESHI Co. Ltd. (Chengdu, China). Sodium nitrate was obtained from Boyi Chemical Reagent Co. Ltd. (Chongqing, China). Ferrous chloride was obtained from Shanghai yuanye Bio-Technology Co., Ltd. Ferric sulfate was obtained from Shanghai Shanhai Engineering Group Experimental Factory no.2 (Shanghai, China). Other chemicals were of analytical reagent grade and used without further purified. Ultrapure water ( $18.2 \text{ M}\Omega/\text{cm}$ ) was utilized throughout the whole experiment.

### ***1.2. Instruments***

Ultrasonic bath is KQ-400B from Kunshan Ultrasonic Instruments Co. Ltd. (Shanghai, China). Thermostatic metal bath (Tansoole, China) is employed to incubate the samples. The time-depending absorption spectra were recorded on a UV-2450 UV-vis spectrophotometer (Shimadzu, Japan). The most absorption spectra were recorded on the microplate reader (BioTek, USA). The centrifugation was utilized to collect the nanostructures (Thermo Fisher Scientific, USA). Transmission electron microscope (TEM), high-resolution TEM (HRTEM), and energy dispersive X-ray spectroscopy were performed by Tecnai TF30 (FEI, USA).

### ***1.3. The Preparation of the Conjugated CTAB-Au(I) Mixture***

Firstly, the stocking solutions, including CTAB (100 mM),  $\text{HAuCl}_4$  (25 mM) and L-ascorbic acid (AA, 100 mM) were prepared. Then, A portion of 1.5 mL CTAB,

and 150  $\mu\text{L}$   $\text{HAuCl}_4$  was mixed together in a sample bottle with the volume of 20 mL. After that, 7450  $\mu\text{L}$  ultrapure water was added. In order to prepare the conjugated Au(I) solution, 900  $\mu\text{L}$  AA was immediately added into the mixture.

### ***1.5. The Preparation of Exfoliated MoS<sub>2</sub>***

The MoS<sub>2</sub> and sodium cholate was weighed and prepared to be 5 mg/mL and 1.5 mg/mL, respectively. Then, the solution was treated with ultrasonic bath for 12 h. The color changes of the solution from black to dark green indicted the formation of the layered MoS<sub>2</sub>. Then, the purification of exfoliated MoS<sub>2</sub> nanosheets was conducted. The samples are treated with centrifugation at 3000 rpm for 30 min and the supernatant was collected in order to remove the large-size unexfoliated MoS<sub>2</sub> sediments. Lastly, the supernatant, containing exfoliated MoS<sub>2</sub> and the surfactant, was centrifugated at 10000 rpm for 30 min, and the sediments were re-dispersed into the pure water to obtain the liquid-exfoliated MoS<sub>2</sub> aqueous dispersions.

### ***1.6. Hg<sup>2+</sup> Detections Using the CTAB-Au(I) Solutions in the Presence and Absence of Exfoliated MoS<sub>2</sub>***

To begin with, 23  $\mu\text{L}$  of MoS<sub>2</sub> was diluted to be 73  $\mu\text{L}$ , which was stored in a small sample bottle. Then, a portion of 0.3 mL Hg<sup>2+</sup> ions with different concentrations was added. Then, the whole sample was incubated for 30 min, for the conjugation of Hg<sup>2+</sup> ions with MoS<sub>2</sub>. After that, 1 mL of CTAB-Au(I) reaction solutions was added into the MoS<sub>2</sub> and Hg<sup>2+</sup> ions mixture, and the system was further incubated for diverse times. In order to achieve the measurements, a portion of 200  $\mu\text{L}$  reaction solutions was moved to the 96-well plate for absorption spectrum scanning (400-999 nm). As a control, the MoS<sub>2</sub> dispersions were replaced by the ultrapure water, and consistent operation was conducted for the measurements of Hg<sup>2+</sup> ions in the absence of MoS<sub>2</sub>.

### ***1.7. The Interference of the Detections of Hg<sup>2+</sup> Ions***

The solutions of multifarious metal ions are prepared and diluted to be 1 mM, 100  $\mu\text{M}$  and 1  $\mu\text{M}$ , respectively. Then, Hg<sup>2+</sup> with a concentration of 1  $\mu\text{M}$  was totally mixed. The mixtures (0.3 mL) containing the co-existing compounds and Hg<sup>2+</sup> were

collected, and the  $\text{Hg}^{2+}$  detections based on the CTAB-Au(I) solutions were conducted in the presence of  $\text{MoS}_2$ .

## 2. Supplementary Figures

### Figure S1

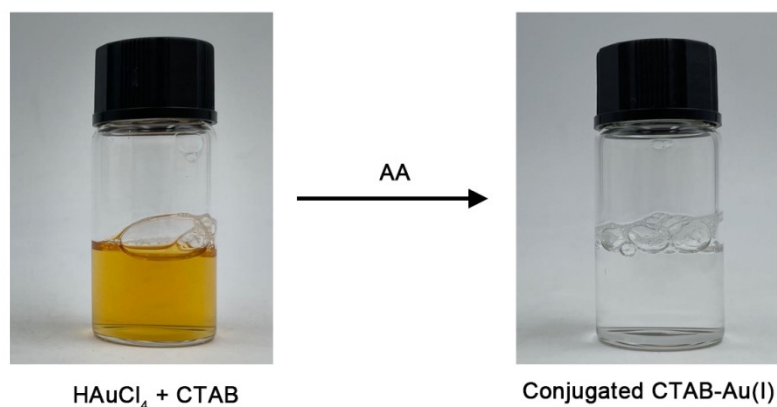

**Fig. S1.** The photos showing the mixture of H[AuCl<sub>4</sub>] and CTAB solutions before and after the addition of AA.

### Figure S2

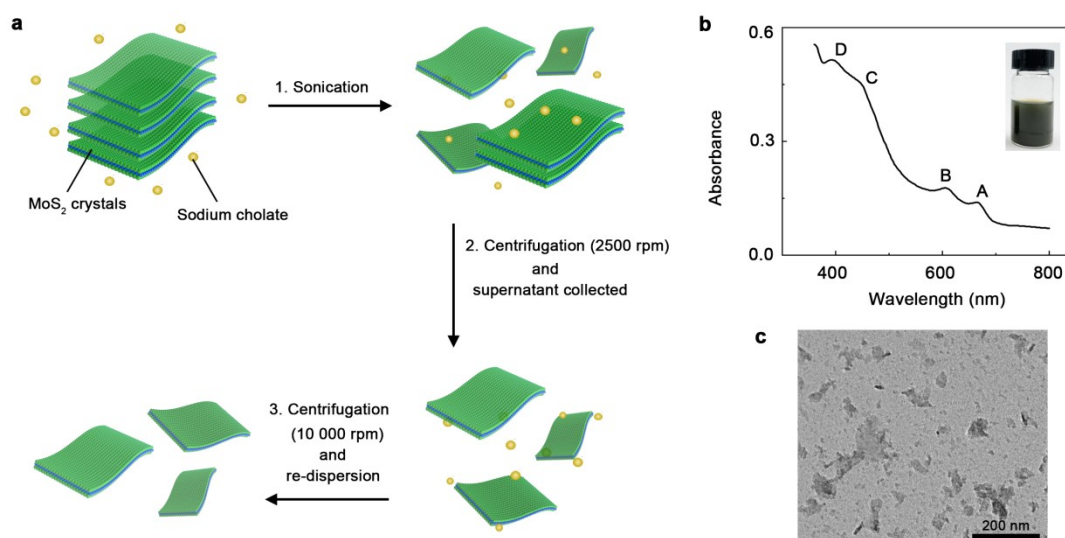

**Fig. S2.** (a) The scheme illustration showing the exfoliation and size separation of MoS<sub>2</sub> nanosheets. (b) The optical absorption spectrum of the exfoliated MoS<sub>2</sub> aqueous dispersion, exhibiting four characteristic A, B, C, D absorption peaks. (c) The TEM image of exfoliated MoS<sub>2</sub>. The plane sizes of exfoliated MoS<sub>2</sub> are various from 30-100 nm.

**Figure S3**

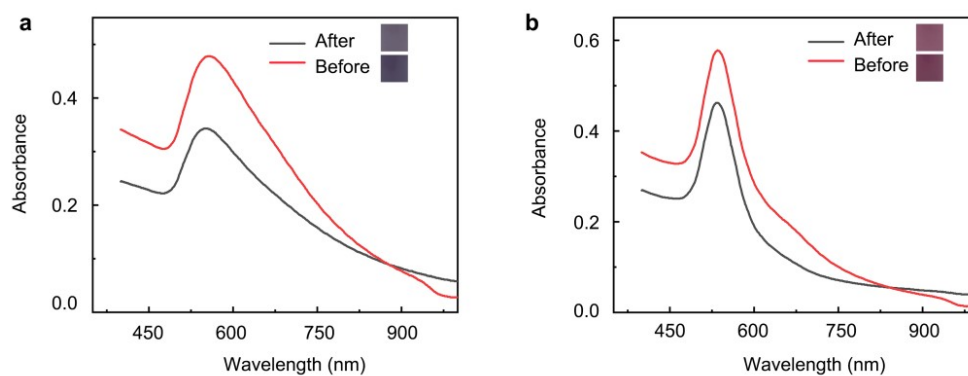

**Fig. S3.** The absorption spectra of Au-MoS<sub>2</sub> reaction products before and after the removal of CTAB via the centrifugation. The concentrations of Hg<sup>2+</sup> ions were 100 nM (a) and 2  $\mu$ M (b), respectively.

**Figure S4**

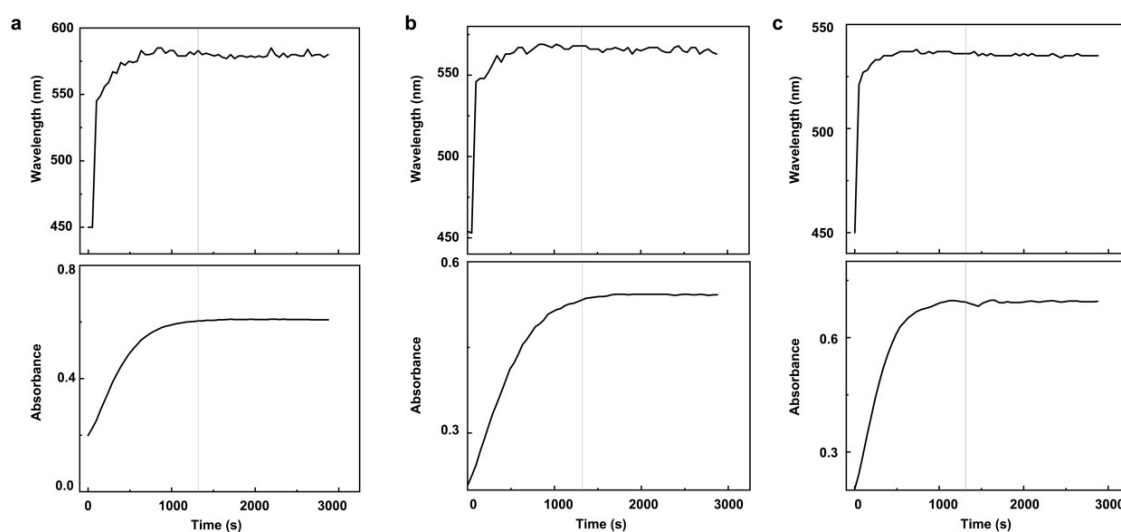

**Fig. S4.** Time-dependent changes of peak wavelengths and absorbance of MoS<sub>2</sub>-CTAB-Au(I) reaction systems in the absence (a) and presence (b and c) of differential concentrations of Hg<sup>2+</sup> ions (b: 100 nM, c: 2  $\mu$ M).

**Figure S5**

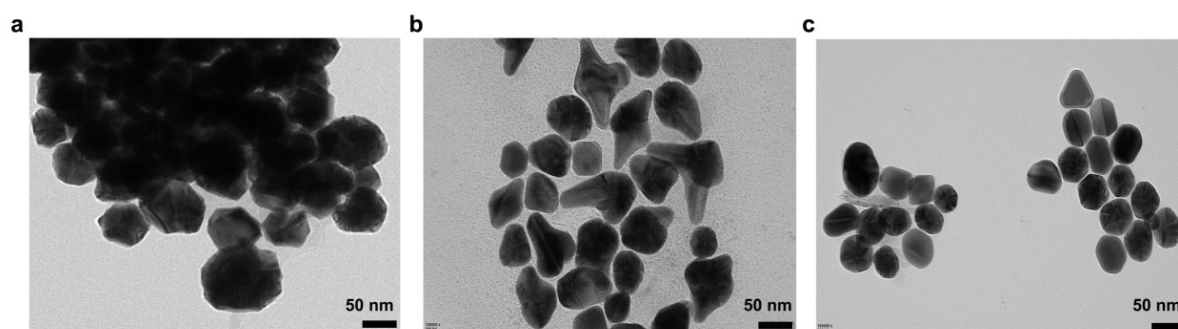

**Fig. S5.** The TEM images of final products of MoS<sub>2</sub>-CTAB-Au(I) reaction systems in the absence (a) and presence (b and c) of differential concentrations of Hg<sup>2+</sup> ions (b: 125 nM, c: 1 μM).

**Table S1.** The relative deviation caused by various chemical species at different ratios to Hg<sup>2+</sup> ions. The concentrations of Hg<sup>2+</sup> ions are 100 nM.

| Species                           | Ratio | Relative Deviation | Species                                         | Ratio  | Relative Deviation |
|-----------------------------------|-------|--------------------|-------------------------------------------------|--------|--------------------|
| MnCl <sub>2</sub>                 | 100:1 | 4.12%              | Mg(NO <sub>3</sub> ) <sub>2</sub>               | 1000:1 | 2.97%              |
| NaNO <sub>3</sub>                 | 100:1 | 4.12%              | BaCl <sub>2</sub>                               | 1000:1 | 2.97%              |
| Pb(NO <sub>3</sub> ) <sub>2</sub> | 10:1  | 2.97%              | Fe <sub>2</sub> (SO <sub>4</sub> ) <sub>3</sub> | 1000:1 | 1.80%              |
| Zn(NO <sub>3</sub> ) <sub>2</sub> | 100:1 | 5.81%              | Ca(NO <sub>3</sub> ) <sub>2</sub>               | 100:1  | 3.51%              |
| Cd(NO <sub>3</sub> ) <sub>2</sub> | 100:1 | 2.97%              | Co(NO <sub>3</sub> ) <sub>2</sub>               | 100:1  | 4.12%              |
| FeCl <sub>2</sub>                 | 10:1  | 3.51%              | EDTA                                            | 1000:1 | 4.91%              |
| NiCl <sub>2</sub>                 | 100:1 | 4.91%              |                                                 |        |                    |
